# Supplementary material for: Changes in Estimating the Wild Boar Carcasses Sampling Effort: Applying the EFSA ASF Exit Strategy by Means of the WBC-Counter Tool
Source: MDPI journal article supplement (doi:10.3390/v14071424), 2022-06-28
Supplement: s1 [file s1]

**Table S1.** Data on carcasses used to implement the Sardinian Exit Strategy. Data are reported by Hunting management Units with associated starting data of the Exit Strategy, data of carcasses founding, location of founding (municipality), and related phase of screening or confirmation.

| Hunting Management Unit *                   | Date of Finding | Municipality  | Phase        |
|---------------------------------------------|-----------------|---------------|--------------|
| Goceano-Gallura (29/11/2020)                | 13/02/2021      | Bono          | screening    |
|                                             | 23/07/2021      | Olbia         | screening    |
|                                             | 02/08/2021      | Olbia         | screening    |
|                                             | 22/08/2021      | Alà dei Sardi | confirmatory |
|                                             | 04/09/2021      | Padru         | confirmatory |
|                                             | 20/10/2021      | Orotelli      | confirmatory |
|                                             | 12/02/2022      | Bono          | confirmatory |
|                                             | 10/02/2022      | Illorai       | confirmatory |
| Nuoro-Baronia (06/01/2020)                  | 29/01/2020      | Oliena        | screening    |
|                                             | 10/08/2020      | Nuoro         | confirmatory |
|                                             | 09/10/2020      | Bitti         | confirmatory |
|                                             | 19/03/2021      | Golfo Aranci  | confirmatory |
|                                             | 12/04/2021      | Nuoro         | confirmatory |
|                                             | 15/09/2021      | Nuoro         | confirmatory |
|                                             | 30/10/2021      | Nuoro         | confirmatory |
|                                             | 12/11/2022      | Bitti         | confirmatory |
|                                             | 15/11/2021      | Golfo Aranci  | confirmatory |
| Gennargentu-Ogliastra (17/01/2021)<br>Total | 19/11/2021      | Posada        | confirmatory |
|                                             | 20/05/2021      | Aritzo        | screening    |
|                                             | 02/08/2021      | Nurri         | screening    |
|                                             | 17/08/2021      | Seui          | screening    |
|                                             | 30/08/2021      | Baunei        | confirmatory |
|                                             | 08/09/2021      | Nurri         | confirmatory |
|                                             | 20/10/2021      | Sadali        | confirmatory |
|                                             | 29/11/2021      | Olzai         | confirmatory |
|                                             | 16/12/2021      | Talana        | confirmatory |
|                                             | 18/03/2022      | Triei         | confirmatory |
|                                             | 26/04/2022      | Gadoni        | confirmatory |

\* Data are reported as name of the area and starting date (dd/mm/yyyy).
